# Supplementary material for: Hemostasis System and Plasminogen Activity in Retrochorial Hematoma in the First Trimester of Pregnancy
Source: MDPI journal article supplement (doi:10.3390/biomedicines10092284), 2022-09-14
Supplement: s1 [file s1]

## Supplementary Files

**Table S1.** The pattern of the distribution of hemostasis parameters in the Shapiro-Wilk W-test.

| Index                                             | Normal pregnancy,<br>N=57    | Retrochorial hematoma,<br>N=16 |
|---------------------------------------------------|------------------------------|--------------------------------|
| Prothrombin time (PT), s                          | W=0.84649, <b>p=0.00000</b>  | W=0.93511, p=0.29331           |
| Activated partial thrombin time<br>(aPTT), s      | W=0.93174, <b>p=0.00317</b>  | W=.96886, p=.81984             |
| Thrombin time (TT), s                             | W=0.94843, <b>p=0.01670</b>  | W=0.92278, p=0.18698           |
| Fibrinogen, g/l                                   | W=0.97871, p=0.41072         | W=0.91309, p=0.13054           |
| Soluble Fibrin Monomeric<br>Complexes (SFMC), mg% | W=0.65547, <b>p=0.00000</b>  | W=0.66552, <b>p=0.00007</b>    |
| D-dimer, ng/ml                                    | W= 0.6301, <b>p= 0.00000</b> | W=0.68269, <b>p=0.00011</b>    |
| Plasminogen (PG) activity, %                      | W=0.95700, <b>p=0.04122</b>  | W=0.86859, <b>p=0.02588</b>    |
| Plasminogen concentration,<br>mcg/ml              | W=0.71368, <b>p=0.00000</b>  | W=0.78619, <b>p=0.00180</b>    |
| IgG-plasminogen, units                            | W=0.75293, <b>p=0.00000</b>  | W=0.61536, <b>p=0.00002</b>    |
| IgM-plasminogen, units                            | W=0.93112, <b>p=0.00299</b>  | W=0.67346, <b>p=0.00009</b>    |
| IgA-plasminogen, units                            | W=0.95438, <b>p=0.03119</b>  | W=0.94682, p=0.44101           |
| PG/IgM-PG activity                                | W=0.89123, <b>p=0.00010</b>  | W=0.92566, p=0.20796           |
| gestational age                                   | W=0.90858, <b>p=0.00039</b>  | W=0.94141, p=0.36670           |

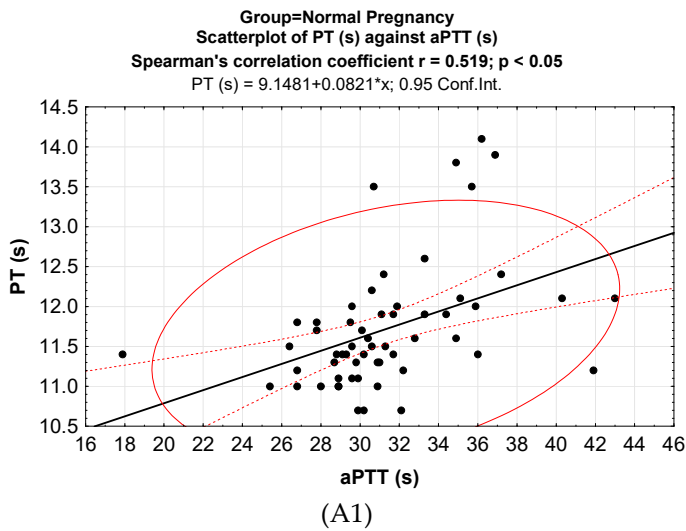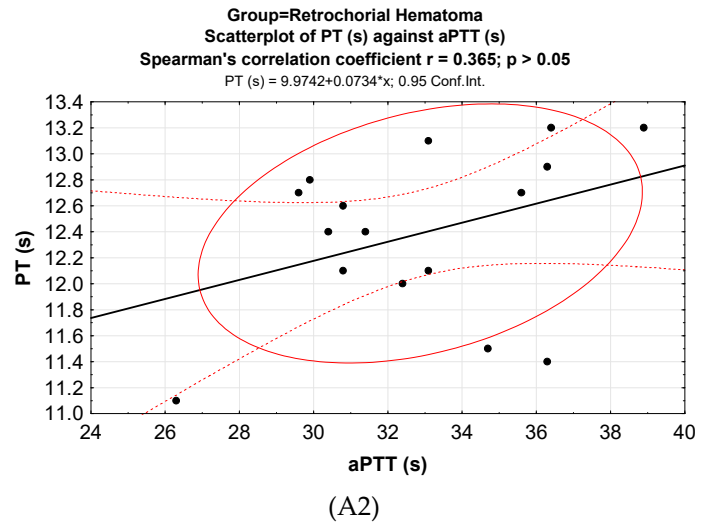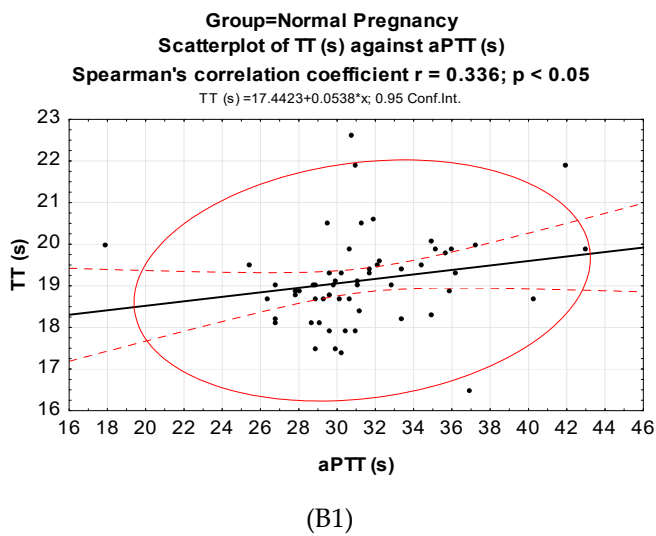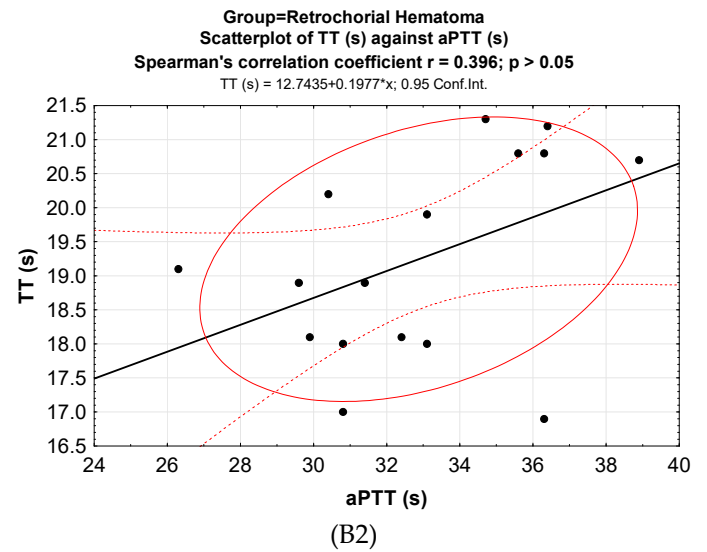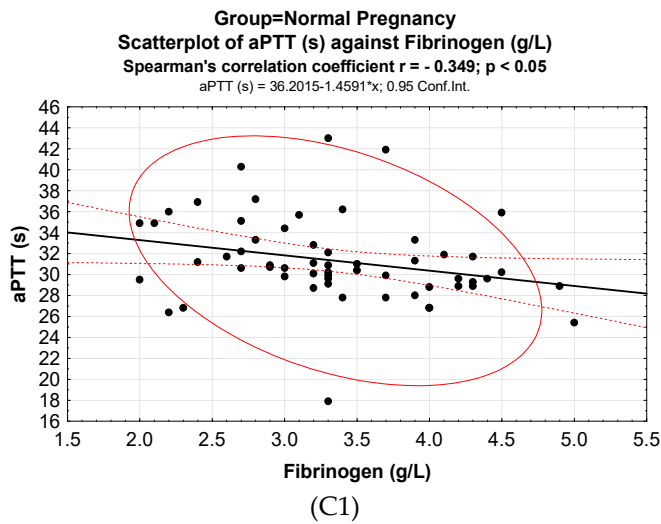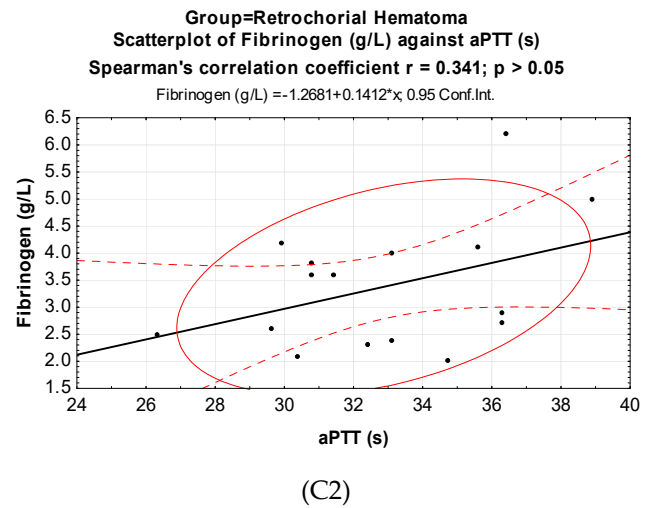

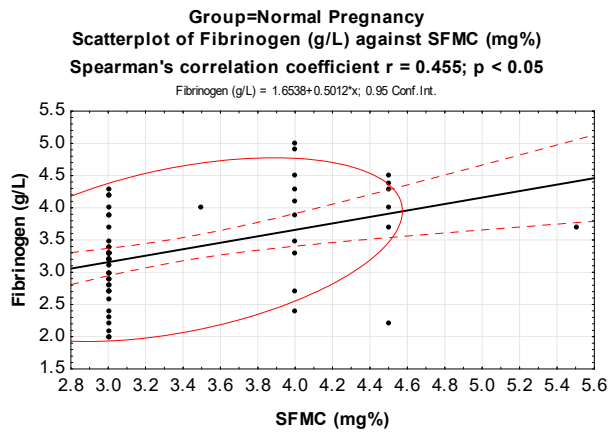

(D1)

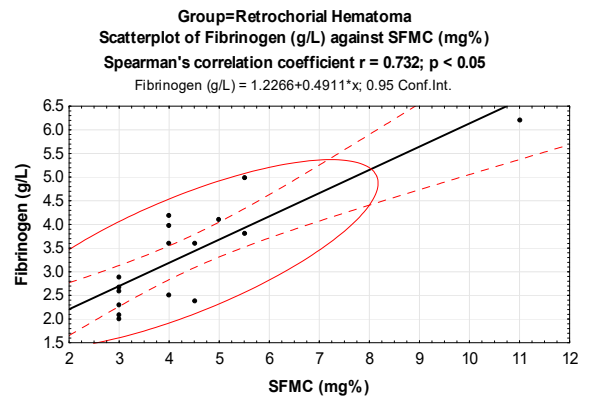

(D2)

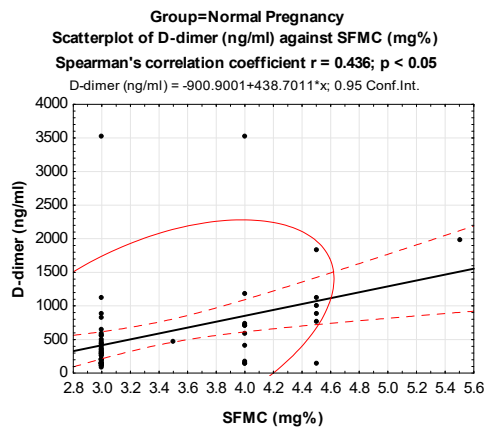

(E1)

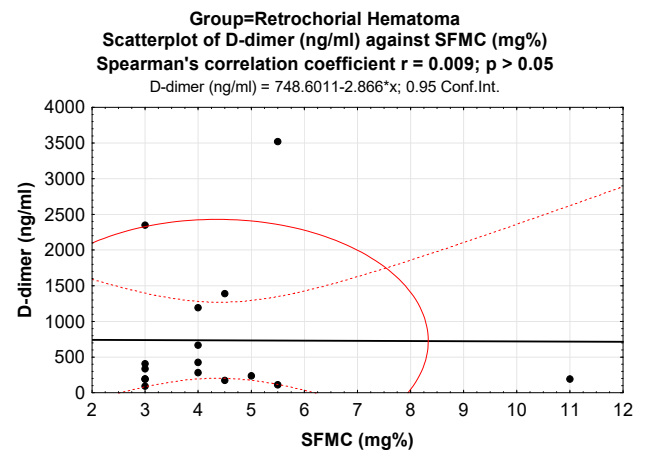

(E2)

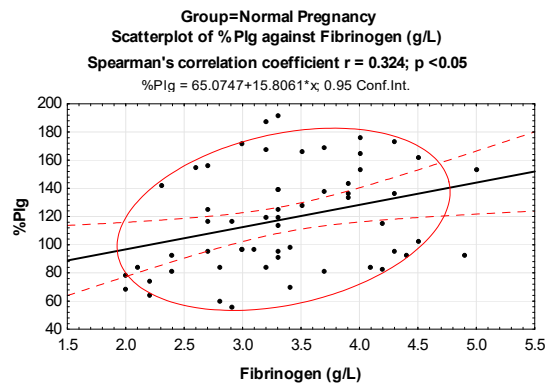

(F1)

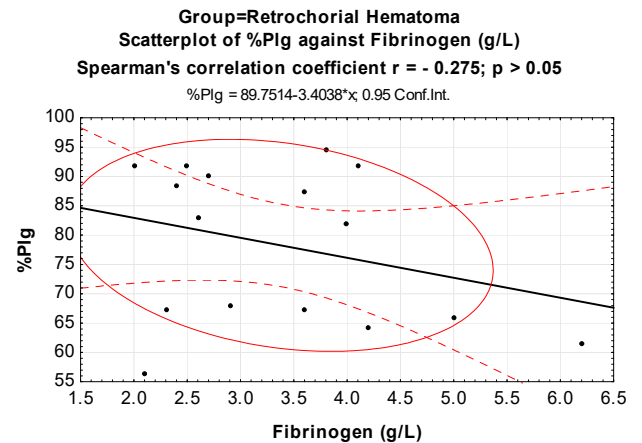

(F2)

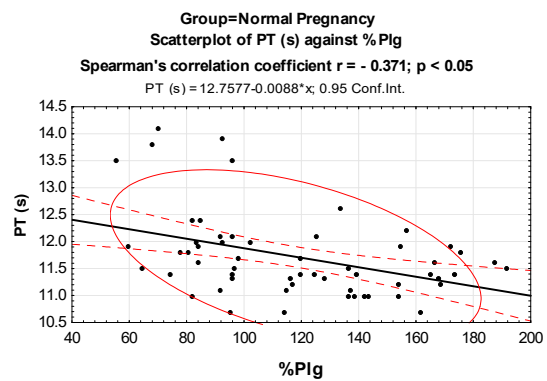

(G1)

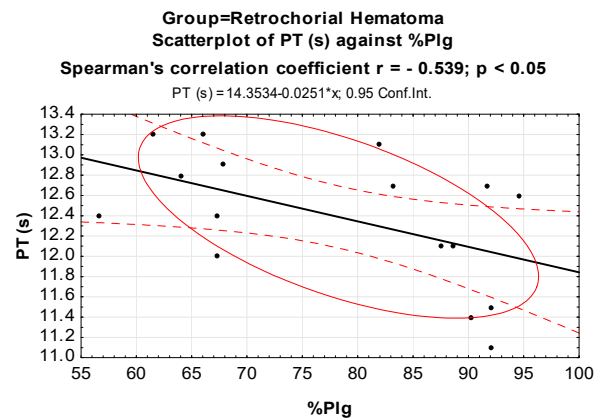

(G2)

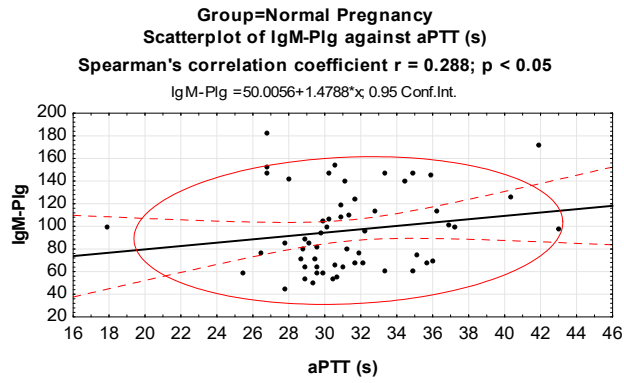

(H1)

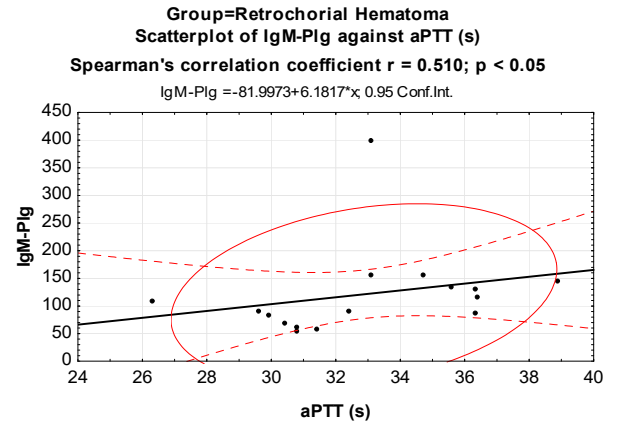

(H2)

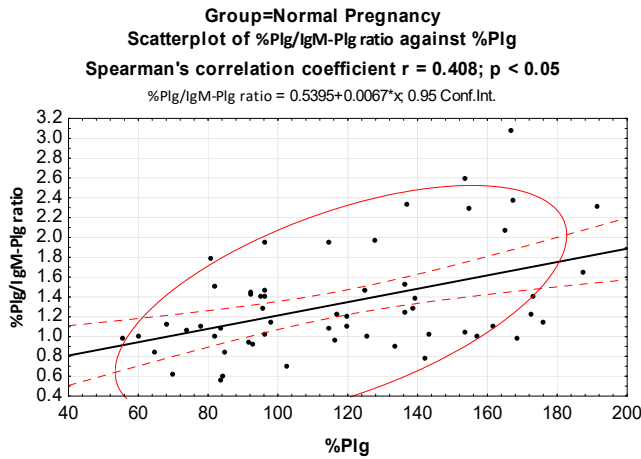

(I1)

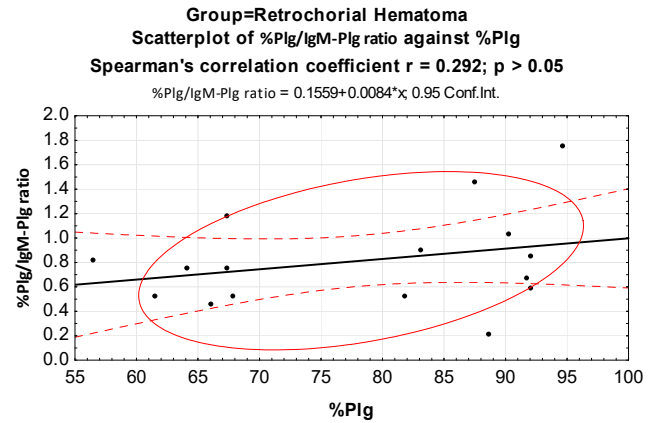

(I2)

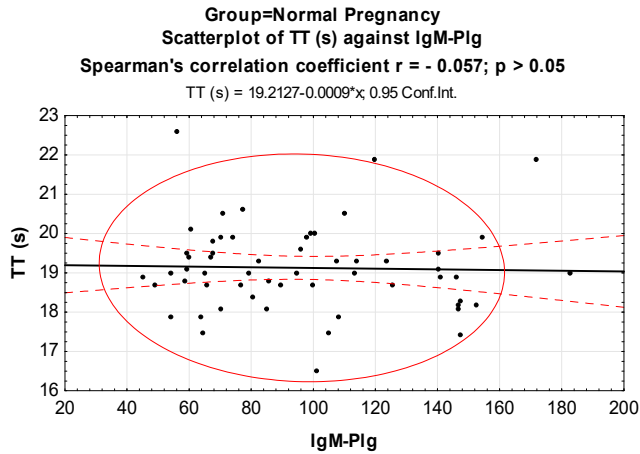

(J1)

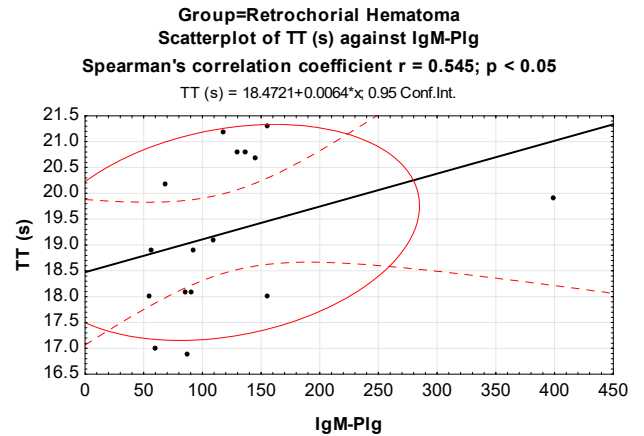

(J2)

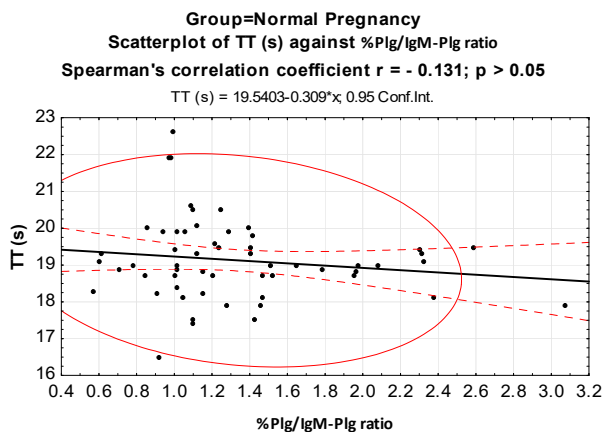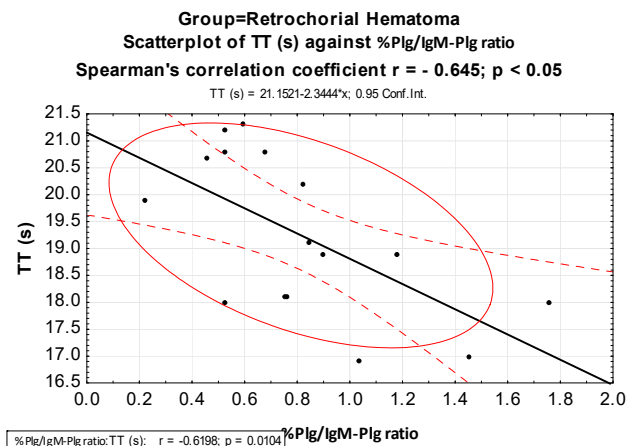

$\% \text{Plg} / \text{IgM-Plg ratio} : \text{TT (s)} : r = -0.6198; p = 0.0104$

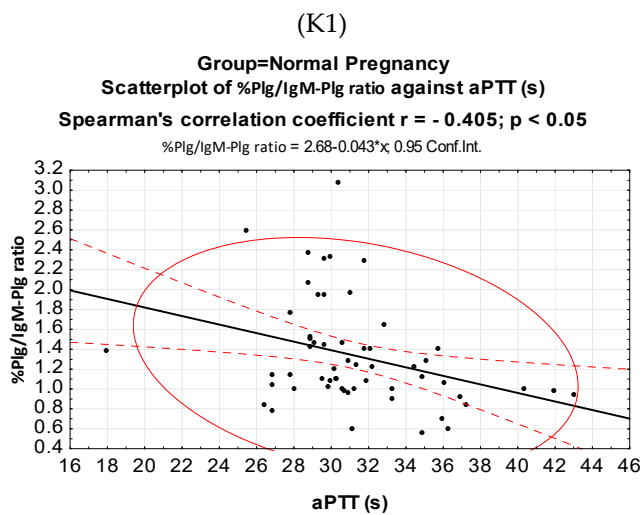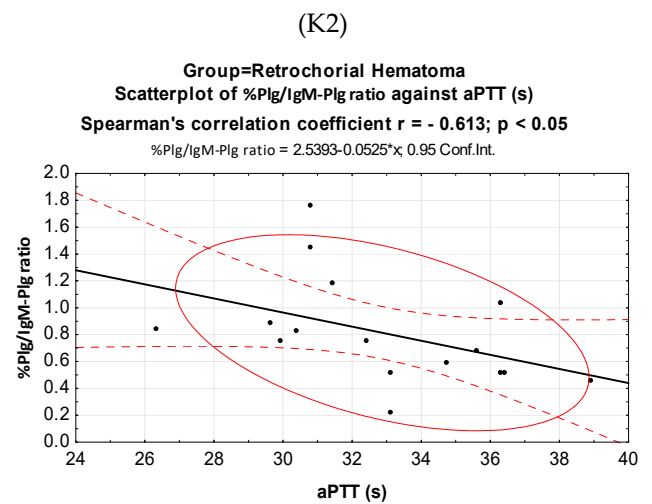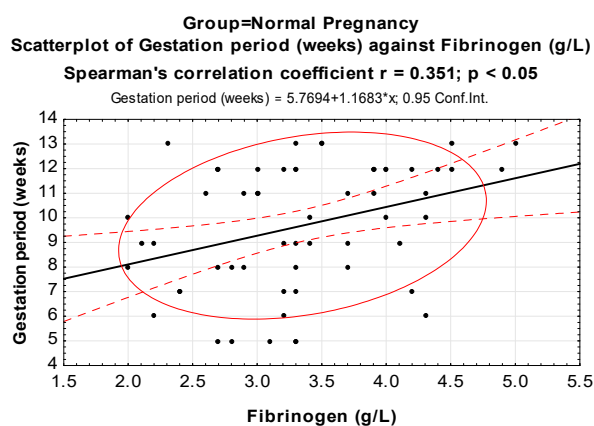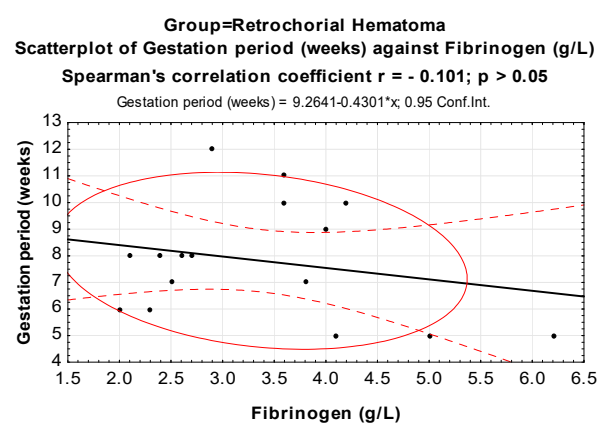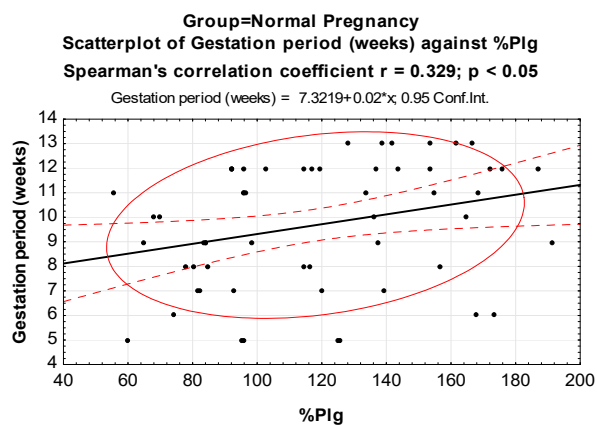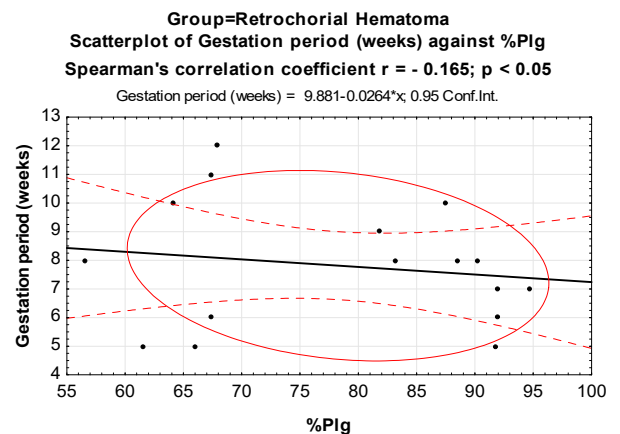

Figure S1. Scatterplots of hemostatic parameters in normal pregnancy (n=56) and with retrochorial hematoma (n=16).
